# Supplementary material for: Understanding of human metabolic pathways of different sub-classes of phenols from Arbutus unedo fruit after an acute intake
Source: Royal Society of Chemistry journal article supplement (doi:10.1039/c6fo00181e), 2016-01-01
Supplement: c6fo00181e2.pdf [file c6fo00181e2.pdf]

**Table S1 Supplementary Information.** Optimized SRM conditions used for quantification for the analysis of phenolic compounds by UPLC-MS/MS.

| Phenolic compound                    | MW  | Quantification |                  |                       | Standard used for quantification   |
|--------------------------------------|-----|----------------|------------------|-----------------------|------------------------------------|
|                                      |     | SRM            | Cone voltage (v) | Collision energy (eV) |                                    |
| Catechol                             | 110 | 108.9 > 90.9   | 40               | 15                    | Catechol                           |
| Catechol sulfate                     | 190 | 189 > 109      | 20               | 15                    | Catechol                           |
| Catechol glucuronide                 | 286 | 285 > 123      | 40               | 15                    | Catechol                           |
| Pyrogallol sulfate                   | 206 | 205 > 125      | 20               | 15                    | Catechol                           |
| Methyl pyrogallol sulfate            | 220 | 219 > 124      | 20               | 25                    | Catechol                           |
| Pyrogallol glucuronide               | 302 | 301 > 125      | 20               | 10                    | Catechol                           |
| Pyrogallol glucuronide-sulfate       | 382 | 381 > 125      | 20               | 10                    | Catechol                           |
| <i>p</i> -Hydroxybenzoic acid        | 138 | 137 > 93       | 30               | 15                    | <i>p</i> -Hydroxybenzoic acid      |
| Hydroxybenzoic acid                  | 138 | 137 > 93       | 30               | 15                    | <i>p</i> -Hydroxybenzoic acid      |
| Protocatechuic acid                  | 154 | 153 > 109      | 40               | 15                    | Protocatechuic acid                |
| Gallic acid                          | 170 | 169 > 125      | 35               | 10                    | Gallic acid                        |
| Gallic acid hexoside                 | 332 | 331 > 169      | 40               | 15                    | Gallic acid                        |
| Mono- <i>O</i> -galloylquinic acid   | 344 | 343 > 191      | 40               | 15                    | Gallic acid                        |
| Di- <i>O</i> -galloylquinic acid     | 496 | 495 > 191      | 40               | 25                    | Gallic acid                        |
| Tri- <i>O</i> -galloylquinic acid    | 648 | 647 > 495      | 40               | 15                    | Gallic acid                        |
| Tetra- <i>O</i> -galloylquinic acid  | 630 | 629 > 477      | 40               | 15                    | Gallic acid                        |
| Mono- <i>O</i> -galloylshikimic acid | 326 | 325 > 169      | 40               | 20                    | Gallic acid                        |
| Di- <i>O</i> -galloylshikimic acid   | 478 | 477 > 325      | 40               | 20                    | Gallic acid                        |
| Gallic acid sulphate                 | 250 | 249 > 169      | 35               | 15                    | Gallic acid                        |
| Gallic acid glucuronide              | 346 | 345 > 169      | 35               | 15                    | Gallic acid                        |
| Syringic acid                        | 198 | 197 > 182      | 30               | 10                    | Syringic acid                      |
| Ellagic acid arabinoside             | 434 | 433 > 300      | 40               | 30                    | Ellagic acid                       |
| Ellagic acid glucuronide             | 478 | 477 > 301      | 40               | 20                    | Ellagic acid                       |
| Strictinin ellagitannin              | 634 | 633 > 301      | 40               | 30                    | Ellagic acid                       |
| <i>p</i> -Hydroxyphenylacetic acid   | 152 | 151 > 107      | 20               | 10                    | <i>p</i> -Hydroxyphenylacetic acid |
| Dihydroxyphenylacetic acid           | 168 | 167 > 123      | 20               | 10                    | 3,4-Dihydroxyphenylacetic acid     |

|                                         |     |           |    |    |                                         |
|-----------------------------------------|-----|-----------|----|----|-----------------------------------------|
| 3-(4-Hydroxyphenyl)propionic acid       | 166 | 165 > 121 | 20 | 10 | 3-(4-Hydroxyphenyl)propionic acid       |
| Hydroxyphenylpropionic acid             | 166 | 165 > 121 | 20 | 10 | 3-(4-Hydroxyphenyl)propionic acid       |
| 3-(2',4'-Dihydroxyphenyl)propionic acid | 181 | 181 > 137 | 20 | 15 | 3-(2',4'-Dihydroxyphenyl)propionic acid |
| Dihydroxyphenylpropionic acid           | 181 | 181 > 137 | 20 | 15 | 3-(2',4'-Dihydroxyphenyl)propionic acid |
| Hippuric acid                           | 179 | 178 > 134 | 40 | 10 | Hippuric acid                           |
| Catechin                                | 290 | 289 > 245 | 45 | 15 | Catechin                                |
| Gallocatechin – catechin                | 594 | 593 > 289 | 40 | 30 | Catechin                                |
| Catechin sulfate                        | 370 | 369 > 289 | 40 | 20 | Catechin                                |
| Catechin glucuronide                    | 466 | 465 > 289 | 40 | 20 | Catechin                                |
| Methyl catechin glucuronide             | 480 | 479 > 303 | 40 | 25 | Catechin                                |
| Epicatechin                             | 290 | 289 > 245 | 45 | 15 | Epicatechin                             |
| Epigallocatechin                        | 306 | 305 > 125 | 40 | 15 | Epicatechin                             |
| Epicatechin gallate                     | 442 | 441 > 169 | 40 | 20 | Epicatechin                             |
| Epigallocatechin gallate                | 458 | 457 > 169 | 40 | 15 | Epicatechin                             |
| Methyl epicatechin sulfate              | 384 | 383 > 303 | 45 | 15 | Epicatechin                             |
| Methyl epicatechin glucuronide          | 480 | 479 > 303 | 40 | 25 | Epicatechin                             |
| Dimer                                   | 578 | 577 > 289 | 45 | 20 | Dimer B <sub>2</sub>                    |
| Trimer                                  | 865 | 865 > 287 | 60 | 30 | Dimer B <sub>2</sub>                    |
| Quercetin-3- <i>O</i> -glucoside        | 464 | 463 > 301 | 45 | 25 | Quercetin                               |
| Quercetin glucoside                     | 464 | 463 > 301 | 45 | 25 | Quercetin                               |
| Quercetin arabinoside                   | 434 | 433 > 300 | 45 | 20 | Quercetin                               |
| Quercetin rhamnoside                    | 448 | 447 > 301 | 40 | 15 | Quercetin                               |
| Dihydroquercetin                        | 304 | 303 > 285 | 45 | 15 | Quercetin                               |
| Quercetin galloyl hexoside              | 616 | 615 > 463 | 40 | 30 | Quercetin                               |
| Kaempferol-3- <i>O</i> -glucoside       | 448 | 447 > 285 | 45 | 15 | Kaempferol                              |
| Kaempferol-3- <i>O</i> -rhamnoside      | 432 | 431 > 285 | 45 | 20 | Kaempferol                              |
| Kaempferol-3- <i>O</i> -rutinoside      | 594 | 593 > 285 | 50 | 25 | Kaempferol                              |
| Dihydrokaempferol                       | 288 | 287 > 259 | 45 | 10 | Kaempferol                              |
| Dihydrokaempferol hexoside              | 450 | 449 > 269 | 40 | 15 | Kaempferol                              |
| Myricetin glucoside                     | 480 | 479 > 317 | 45 | 20 | Myricetin                               |
| Myricetin rhamnoside                    | 464 | 463 > 317 | 50 | 25 | Myricetin                               |
| Cyanidin-3- <i>O</i> -glucoside *       | 450 | 449 > 287 | 40 | 20 | Cyanidin-3- <i>O</i> -Glucoside         |
| Cyanidin arabinoside *                  | 420 | 419 > 287 | 40 | 20 | Cyanidin-3- <i>O</i> -Glucoside         |
| Delphinidin arabinoside *               | 436 | 435 > 303 | 40 | 20 | Cyanidin-3- <i>O</i> -Glucoside         |
| Delphinidin glucoside *                 | 466 | 465 > 303 | 40 | 20 | Cyanidin-3- <i>O</i> -Glucoside         |

|                                      |     |           |    |    |                                    |
|--------------------------------------|-----|-----------|----|----|------------------------------------|
| Pelargonidin arabinoside *           | 404 | 403 > 271 | 40 | 20 | Cyanidin-3- <i>O</i> -Glucoside    |
| Pelargonidin glucoside *             | 434 | 433 > 271 | 40 | 20 | Cyanidin-3- <i>O</i> -Glucoside    |
| Peonidin arabinoside *               | 434 | 433 > 301 | 40 | 20 | Cyanidin-3- <i>O</i> -Glucoside    |
| Peonidin glucoside *                 | 464 | 463 > 301 | 40 | 20 | Cyanidin-3- <i>O</i> -Glucoside    |
| Hydroxy urolithin (urolithin B) *    | 212 | 213 > 141 | 40 | 20 | Hydroxy urolithin (urolithin B)    |
| Dihydroxy urolithin (urolithin A) *  | 230 | 229 > 157 | 40 | 20 | Dihydroxy urolithin (urolithin A)  |
| Trihydroxy urolithin (urolithin C) * | 246 | 245 > 155 | 40 | 30 | Trihydroxy urolithin (urolithin C) |
| Hydroxy urolithin glucuronide        | 388 | 387 > 211 | 40 | 20 | Hydroxy urolithin (urolithin B)    |
| Dihydroxy urolithin glucuronide      | 404 | 403 > 227 | 40 | 30 | Dihydroxy urolithin (urolithin A)  |
| Tetrahydroxy urolithin *             | 262 | 261 > 171 | 40 | 25 | Trihydroxy urolithin (urolithin C) |
| Tetrahydroxy urolithin sulfate       | 340 | 339 > 259 | 40 | 20 | Trihydroxy urolithin (urolithin C) |
| Pentahydroxy urolithin *             | 278 | 277 > 187 | 40 | 30 | Trihydroxy urolithin (urolithin C) |

---

MW: molecular weight (g/mol)

\* ESI positive
