# Supplementary material for: Understanding of human metabolic pathways of different sub-classes of phenols from Arbutus unedo fruit after an acute intake
Source: Royal Society of Chemistry journal article supplement (doi:10.1039/c6fo00181e), 2016-01-01
Supplement: c6fo00181e3.pdf [file c6fo00181e3.pdf]

**Table S2 Supplementary Information.** Instrumental quality parameters for the determination of phenolic compounds in biological samples after the *Arbutus unedo* intake.

| Phenolic compound                       | Linearity range (µM)    | Calibration curve                      | RSD (%)<br>(25 µM), n=3 | Accuracy (%)<br>(25 µM), n=3 | LOD (µM)            | LOQ (µM)            |
|-----------------------------------------|-------------------------|----------------------------------------|-------------------------|------------------------------|---------------------|---------------------|
| <b>Blood samples</b>                    |                         |                                        |                         |                              |                     |                     |
| Catechol                                | 0.10-110                | $y = 239.47 x - 17.75$                 | 104                     | 104                          | 0.04                | 0.10                |
| Hippuric acid                           | 0.10-70                 | $y = 96.07 x + 202.89$                 | 99                      | 98                           | 0.03                | 0.10                |
| <i>p</i> -Hydroxybenzoic acid           | 0.10-90                 | $y = 174.15 x + 424.29$                | 98                      | 102                          | 0.03                | 0.10                |
| 3-(4-hydroxyphenyl)propionic acid       | 0.10-80                 | $y = 170.21 x + 127.05$                | 103                     | 99                           | 0.03                | 0.10                |
| <b>Urine samples</b>                    |                         |                                        |                         |                              |                     |                     |
| Catechol                                | 0.9-50                  | $y = 473.25 x - 30.27$                 | 102                     | 103                          | 0.3                 | 0.9                 |
| 3-(4-hydroxyphenyl)propionic acid       | 0.06-35                 | $y = 346.51 x + 253.21$                | 100                     | 99                           | 0.02                | 0.06                |
| Protocatechuic acid                     | 0.06-30                 | $y = 891.56 x - 15.21$                 | 105                     | 98                           | 0.02                | 0.06                |
| Gallic acid                             | 0.06-30                 | $y = 1247.39 x + 34.30$                | 101                     | 96                           | 0.02                | 0.06                |
| Hippuric acid                           | 0.05-50                 | $y = 949.4 x + 795.26$                 | 101                     | 97                           | 0.03                | 0.08                |
| Syringic acid                           | 0.05-25                 | $y = 1189.2 x + 710.42$                | 95                      | 104                          | 0.03                | 0.05                |
| Catechin                                | 0.03-25                 | $y = 625.25 x - 203.77$                | 95                      | 105                          | 0.01                | 0.03                |
| Epicatechin                             | 0.03-25                 | $y = 413.75 x - 181.54$                | 98                      | 101                          | 0.01                | 0.03                |
| Hydroxy urolithin (urolithin B)         | 0.07-100                | $y = 4373 x + 230.70$                  | 99                      | 102                          | 0.03                | 0.07                |
| Dihydroxy urolithin (urolithin A)       | 0.03-50                 | $y = 15862 x + 730.52$                 | 102                     | 104                          | 0.01                | 0.03                |
| Trihydroxy urolithin (urolithin C)      | 0.003-30                | $y = 64963 x + 5420.5$                 | 103                     | 99                           | 0.001               | 0.003               |
| <b>Faeces samples</b>                   |                         |                                        |                         |                              |                     |                     |
| Catechol                                | 14-710 <sup>(1)</sup>   | $y = 12.46 x + 318.28$ <sup>(2)</sup>  | 102 <sup>(1)</sup>      | 103 <sup>(1)</sup>           | 4.5 <sup>(2)</sup>  | 14 <sup>(2)</sup>   |
| 3-(2',4'-dihydroxyphenyl)propionic acid | 0.9-500 <sup>(1)</sup>  | $y = 112.31 x + 2638.5$ <sup>(2)</sup> | 101 <sup>(1)</sup>      | 98 <sup>(1)</sup>            | 0.3 <sup>(2)</sup>  | 0.9 <sup>(2)</sup>  |
| 3,4-dihydroxyphenylacetic acid          | 1.0-500 <sup>(1)</sup>  | $y = 85.67 x + 448.35$ <sup>(2)</sup>  | 98 <sup>(1)</sup>       | 97 <sup>(1)</sup>            | 0.3 <sup>(2)</sup>  | 1.0 <sup>(2)</sup>  |
| 3-(4-hydroxyphenyl)propionic acid       | 1.0-500 <sup>(1)</sup>  | $y = 375.56 x + 409.94$ <sup>(2)</sup> | 97 <sup>(1)</sup>       | 102 <sup>(1)</sup>           | 0.3 <sup>(2)</sup>  | 1.0 <sup>(2)</sup>  |
| Dihydroxy urolithin (urolithin A)       | 0.3-500 <sup>(1)</sup>  | $y = 1697.5 x + 929.66$ <sup>(2)</sup> | 102 <sup>(1)</sup>      | 96 <sup>(1)</sup>            | 0.1 <sup>(2)</sup>  | 0.3 <sup>(2)</sup>  |
| Gallic acid                             | 0.7-400 <sup>(1)</sup>  | $y = 108.46 x + 13.63$ <sup>(2)</sup>  | 96 <sup>(1)</sup>       | 95 <sup>(1)</sup>            | 0.2 <sup>(2)</sup>  | 0.7 <sup>(2)</sup>  |
| Hippuric acid                           | 0.7-400 <sup>(1)</sup>  | $y = 111.32 x + 92.88$ <sup>(2)</sup>  | 99 <sup>(1)</sup>       | 98 <sup>(1)</sup>            | 0.2 <sup>(2)</sup>  | 0.7 <sup>(2)</sup>  |
| <i>p</i> -Hydroxyphenylacetic acid      | 1.0-560 <sup>(1)</sup>  | $y = 54.56 x - 6516.4$ <sup>(2)</sup>  | 97 <sup>(1)</sup>       | 104 <sup>(1)</sup>           | 0.3 <sup>(2)</sup>  | 1.0 <sup>(2)</sup>  |
| <i>p</i> -Hydroxybenzoic acid           | 1.0-500 <sup>(1)</sup>  | $y = 303.59 x + 2205.1$ <sup>(2)</sup> | 100 <sup>(1)</sup>      | 99 <sup>(1)</sup>            | 0.3 <sup>(2)</sup>  | 1.0 <sup>(2)</sup>  |
| Protocatechuic acid                     | 0.9-500 <sup>(1)</sup>  | $y = 74.02 x + 27.07$ <sup>(2)</sup>   | 104 <sup>(1)</sup>      | 105 <sup>(1)</sup>           | 0.3 <sup>(2)</sup>  | 0.9 <sup>(2)</sup>  |
| Trihydroxy urolithin                    | 0.03-300 <sup>(1)</sup> | $y = 5988.2 x + 678.26$                | 103 <sup>(1)</sup>      | 102 <sup>(1)</sup>           | 0.01 <sup>(2)</sup> | 0.03 <sup>(2)</sup> |

<sup>(1)</sup>: Linearity range, calibration curve, LODs and LOQs in feces are nmols/g lyophilized feces.

<sup>(2)</sup>: %RSD and %accuracy in feces are 100 nmols/g lyophilized feces.
