# Supplementary material for: Understanding of human metabolic pathways of different sub-classes of phenols from Arbutus unedo fruit after an acute intake
Source: Royal Society of Chemistry journal article supplement (doi:10.1039/c6fo00181e), 2016-01-01
Supplement: c6fo00181e4.pdf [file c6fo00181e4.pdf]

**Table S3 Supplementary Information.** Concentration of phenolic compounds and their generated metabolites and its standard deviation ( $\mu\text{mol/L} \pm \text{SD}$ ) detected at different times in volunteer's (1, 2 and 3) blood after the acute intake of 50 g of lyophilized *A. unedo* fruit.

| Phenolic compound<br>( $\mu\text{mol/L}$ blood) | Time 0 h           |                    |                    | Time 0.5 h         |                    |                    | Time 1 h           |                    |                    | Time 2 h           |                    |                    | Time 4 h           |                    |                    | Time 12 h          |                    |                    | Time 24 h          |                    |                    |
|-------------------------------------------------|--------------------|--------------------|--------------------|--------------------|--------------------|--------------------|--------------------|--------------------|--------------------|--------------------|--------------------|--------------------|--------------------|--------------------|--------------------|--------------------|--------------------|--------------------|--------------------|--------------------|--------------------|
|                                                 | 1                  | 2                  | 3                  | 1                  | 2                  | 3                  | 1                  | 2                  | 3                  | 1                  | 2                  | 3                  | 1                  | 2                  | 3                  | 1                  | 2                  | 3                  | 1                  | 2                  | 3                  |
| <i>p</i> -hydroxybenzoic acid                   | n.d.               | 0.11 $\pm$<br>0.15 | n.d.               | n.d.               | 0.16 $\pm$<br>0.06 | 0.85 $\pm$<br>0.28 | 0.10 $\pm$<br>0.05 |
| Hydroxybenzoic acid                             | n.d.               | n.d.               | n.d.               | 5.13 $\pm$<br>3.83 | 13.9 $\pm$<br>1.90 | 7.52 $\pm$<br>1.20 | 13.7 $\pm$<br>4.91 | 19.1 $\pm$<br>3.21 | 1.78 $\pm$<br>2.52 | 3.25 $\pm$<br>0.37 | 11.7 $\pm$<br>3.44 | 0.79 $\pm$<br>0.12 | 0.85 $\pm$<br>0.15 | 13.8 $\pm$<br>3.74 | 0.73 $\pm$<br>0.11 | 15.5 $\pm$<br>1.53 | 60.9 $\pm$<br>6.91 | 38.9 $\pm$<br>3.45 | 0.33 $\pm$<br>0.13 | 124 $\pm$<br>8.39  | 2.97 $\pm$<br>0.80 |
| Hydroxybenzoic acid sulfate                     | n.d.               | 1.24 $\pm$<br>0.02 | n.d.               | n.d.               | n.d.               | n.d.               | n.d.               |
| Catechol sulfate                                | 0.71 $\pm$<br>0.13 | 1.15 $\pm$<br>0.12 | 0.85 $\pm$<br>0.09 | 2.93 $\pm$<br>0.85 | 1.15 $\pm$<br>0.75 | 0.83 $\pm$<br>0.45 | 4.65 $\pm$<br>1.33 | 1.61 $\pm$<br>0.13 | 0.73 $\pm$<br>0.73 | 25.4 $\pm$<br>6.73 | 3.73 $\pm$<br>1.17 | 1.21 $\pm$<br>0.14 | 75.5 $\pm$<br>10.4 | 18.5 $\pm$<br>0.76 | 9.37 $\pm$<br>1.23 | 33.7 $\pm$<br>7.46 | 4.52 $\pm$<br>0.98 | 2.41 $\pm$<br>0.22 | 3.52 $\pm$<br>0.35 | 1.75 $\pm$<br>0.20 | 1.67 $\pm$<br>0.40 |
| Catechol glucuronide                            | n.d.               | 0.16 $\pm$<br>0.00 | n.d.               |
| Pyrogallol sulfate                              | n.d.               | n.d.               | n.d.               | 0.13 $\pm$<br>0.05 | n.d.               | n.d.               | 1.00 $\pm$<br>0.44 | 0.17 $\pm$<br>0.11 | n.d.               | 6.46 $\pm$<br>2.67 | 8.44 $\pm$<br>0.68 | n.d.               | 22.5 $\pm$<br>1.86 | 15.6 $\pm$<br>1.17 | 7.68 $\pm$<br>1.05 | 5.66 $\pm$<br>0.36 | 5.15 $\pm$<br>1.14 | 1.39 $\pm$<br>0.32 | 0.36 $\pm$<br>0.11 | 1.35 $\pm$<br>0.40 | 0.32 $\pm$<br>0.07 |
| Pyrogallol glucuronide                          | n.d.               | 0.05 $\pm$<br>0.00 | n.d.               |
| Methyl pyrogallol sulfate                       | n.d.               | 1.55 $\pm$<br>0.43 | 2.40 $\pm$<br>0.29 | 1.85 $\pm$<br>0.31 | 7.06 $\pm$<br>0.74 | 3.35 $\pm$<br>0.30 | 6.73 $\pm$<br>0.99 | 1.09 $\pm$<br>0.08 | 0.92 $\pm$<br>0.06 | 2.82 $\pm$<br>0.76 | 0.24 $\pm$<br>0.12 | 0.65 $\pm$<br>0.15 | 0.15 $\pm$<br>0.02 |
| Hippuric acid                                   | 0.06 $\pm$<br>0.01 | 0.27 $\pm$<br>0.07 | n.d.               | 0.43 $\pm$<br>0.17 | n.d.               | n.d.               | 0.98 $\pm$<br>0.41 | 0.02 $\pm$<br>0.03 | n.d.               | 3.16 $\pm$<br>1.57 | 0.24 $\pm$<br>0.05 | n.d.               | 7.24 $\pm$<br>0.70 | 0.60 $\pm$<br>0.06 | 2.17 $\pm$<br>0.54 | 7.28 $\pm$<br>1.00 | 0.68 $\pm$<br>0.04 | 9.34 $\pm$<br>1.13 | 4.07 $\pm$<br>0.45 | 4.36 $\pm$<br>1.35 | 5.29 $\pm$<br>1.44 |
| Hydroxyphenylpropionic acid                     | 5.63 $\pm$<br>2.83 | 5.46 $\pm$<br>1.05 | 3.74 $\pm$<br>0.65 | 6.23 $\pm$<br>1.94 | 6.13 $\pm$<br>2.95 | 6.39 $\pm$<br>5.35 | 8.08 $\pm$<br>4.82 | 3.95 $\pm$<br>2.34 | 3.71 $\pm$<br>1.95 | 7.12 $\pm$<br>0.25 | 6.98 $\pm$<br>2.50 | 7.03 $\pm$<br>1.23 | 22.4 $\pm$<br>0.36 | 4.70 $\pm$<br>1.13 | 18.4 $\pm$<br>2.23 | 65.8 $\pm$<br>6.54 | 3.37 $\pm$<br>0.43 | 49.7 $\pm$<br>3.63 | 8.57 $\pm$<br>1.71 | 28.7 $\pm$<br>9.10 | 4.57 $\pm$<br>1.79 |

Concentrations are expressed as mean  $\pm$  SD ( $n=3$ )

n.d.: no detected (Its concentration is below its detection limit (LOD))
