# Supplementary figures and images for: Understanding of human metabolic pathways of different sub-classes of phenols from Arbutus unedo fruit after an acute intake
Source: Royal Society of Chemistry journal article supplement (doi:10.1039/c6fo00181e), 2016-01-01

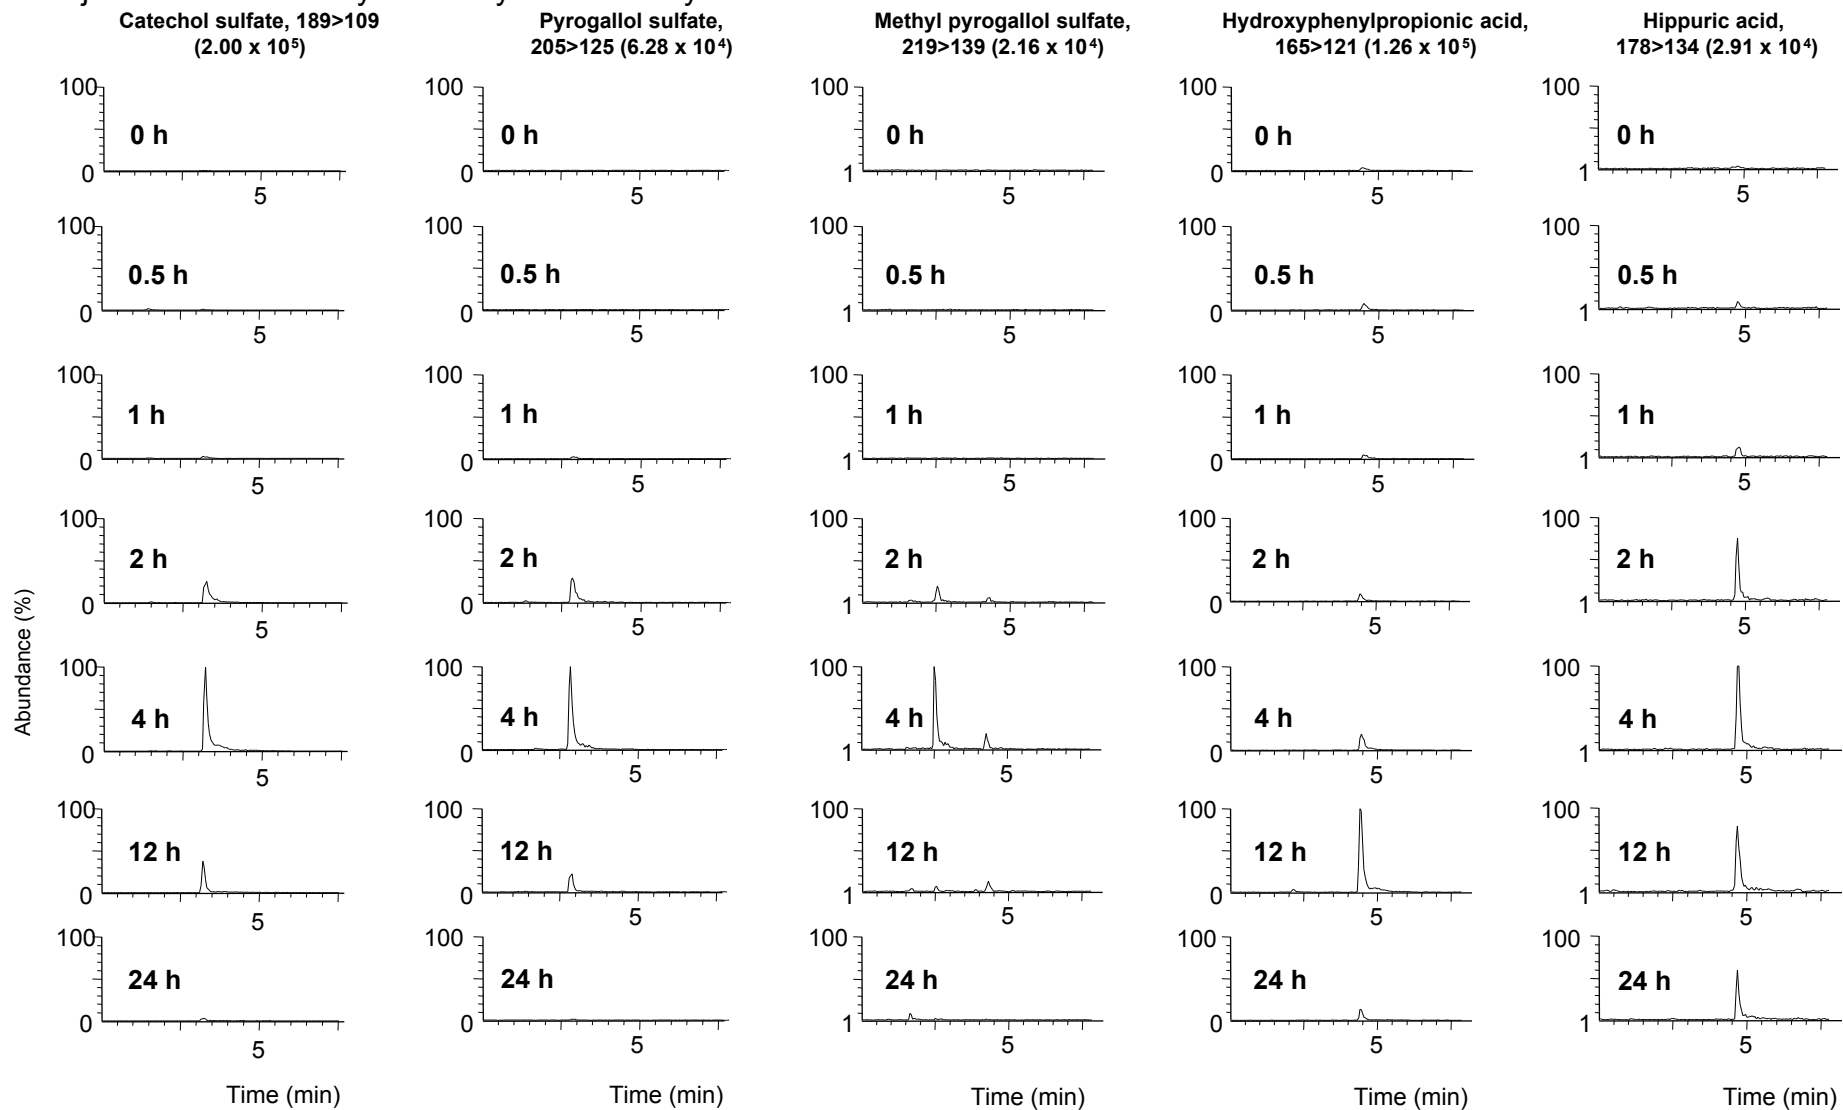

Figure S1 Supplementary Information

Supplement: c6fo00181e1.pdf [file c6fo00181e1.pdf]
